# Supplementary material
Source: Research Square preprint supplement (doi:10.21203/rs.3.rs-9600351/v1)
Supplement: Supplementary file 1 [file 5ba890768115e181ad9e97a2.docx]

| Theme | Subtheme |
| --- | --- |
| Behavioural Disruption | Routine fragmentation and competing priorities |
|  | Cognitive overload and regimen complexity |
|  | Emerging concerns about harm and bodily signals |
|  | Thin support and misaligned reminders |
| Adherence Withdrawal | Rationalising disengagement |
|  | Avoidance and concealment |
|  | Eroded self-efficacy and depleted motivation |
|  | Social withdrawal and reduced help-seeking |
| Resilience Activation | Salience of risk and wake-up moments |
|  | Credible explanation and sense-making |
|  | Vicarious learning and normalisation |
|  | Re-aligning support toward accompaniment |
| Behavioural Recovery | Tooling and planning for execution |
|  | Habit-linking and environmental anchoring |
|  | Contingency strategies and error recovery |
|  | Feedback-driven mastery and confidence rebuilding |
| Re-stabilization | Automaticity and low-burden maintenance |
|  | Identity alignment and self-responsibility narrative |
|  | Recalibrated relationships and sustainable support |
|  | Resilient cycling under new disruptions |

**Appendix Table 1. Themes and subthemes of behavioural resilience in medication adherence after percutaneous coronary intervention**
