# Supplementary material
Source: Research Square preprint supplement (doi:10.21203/rs.3.rs-9600351/v1)
Supplement: Supplementary file 2 [file b732de6bc3dcbe5c8d514194.docx]

**Supplementary File 1. Semi-structured interview guide**

**ENGLISH VERSION**

Study: Behavioural resilience in medication adherence after PCI

Participants: Adults after PCI prescribed secondary-prevention pharmacotherapy

Language: Interviews conducted in Chinese; quotations translated for publication

Estimated duration: 45–60 minutes

Note: Timing and sequencing are flexible and adapted to participants’ narratives. Core questions are asked consistently; probes are used selectively.

**Interviewer opening script**

- Thank you for taking part. We are interested in your experiences of taking prescribed medications after PCI, including times when it was difficult and how you managed.
- Participation is voluntary. You may pause or skip any question. With your permission, we will audio-record the interview. Your information will be kept confidential and de-identified in transcripts.
- Do you have any questions before we begin?

**Section 1. Usual medication-taking routines**

**Core questions**

1. Please walk me through a typical day and how you take your medications?
2. Where do you usually keep your medications, and what helps you remember to take them?
3. Who, if anyone, is involved in your medication routine?

**Probes (as needed)**

- What time(s) do you take each dose? With meals or not?
- What reminders or tools do you use (pill box, phone alarm, notes)?
- What makes it easier or harder to follow your routine?

**Section 2. Missed doses, discontinuation, or regimen changes and circumstances**

**Core questions**

1. In the past month, have there been times when you missed a dose, took it late, stopped a medication, or changed the way you took it? Please describe one or two examples in detail.
2. What was happening around that time?
3. How did you decide what to do in that moment?

**Probes (as needed)**

- Was it mainly forgetting, not wanting to take it, or being unable to take it?
- Were side effects or concerns about harm involved?
- Did you consult a clinician before changing anything? If not, why?

**Section 3. Perceived disruptions and difficult periods sustaining adherence**

**Core questions**

1. Have you experienced a period when it was especially hard to keep taking medications as prescribed? What made it difficult?
2. During that period, how did you feel emotionally?
3. How did those difficulties affect your confidence in continuing long term?

**Probes (as needed)**

- What thoughts went through your mind when you considered skipping or stopping?
- Did you ever hide missed doses from clinicians or family? What led to that?
- If you rate your confidence at that time from 0–10, what number would you give and why?

**Section 4. Turning points and resources facilitating re-engagement**

**Core questions**

1. Was there a turning point that led you to restart or take medications more consistently? What happened?
2. What helped you most to get back on track ?
3. After that turning point, did your understanding of the medication or your condition change? If so, how?

**Probes (as needed)**

- What information or explanation made the biggest difference?
- Who did you seek help from, and what kind of support was most useful?
- What resources were missing, and how did you cope?

**Section 5. Strategies to restore and maintain stable routines over time**

**Core questions**

1. What strategies do you currently use to keep medication-taking stable?
2. What parts of your routine feel most stable now, and what remains vulnerable?
3. What motivates you to continue taking medications long term, and what makes it harder?

**Probes (as needed)**

- Do you have a plan for travel, shift work, unexpected events, or side effects?
- What kinds of feedback strengthen your adherence ?
- Has medication-taking become part of your daily identity? In what way?

**Closing and summary check**

1. If you could give one suggestion to clinicians about how to support patients’ medication-taking after PCI, what would it be?
2. Is there anything important about your medication experience that we have not discussed?

**Interviewer summary check**

- Summarise key points shared by the participant and ask: “Have I understood you correctly? Would you like to add or clarify anything?”

**中文版本**

研究主题：PCI术后患者药物依从行为韧性

访谈对象：PCI术后需长期服用二级预防药物的成人患者

访谈语言：中文

预计时长：约45–60分钟

说明：访谈顺序与时长可根据受访者叙事灵活调整；核心问题为必问，追问根据叙事与时间选择性使用。

**开场说明**

- 感谢您参加。本次访谈想了解您在PCI术后服用医嘱药物的真实经历，包括遇到困难时发生了什么、您是如何应对的。
- 参加完全自愿，您可以随时暂停或跳过任何问题。在您同意的情况下我们会录音，转录后会去标识化，严格保密。
- 在开始之前，您有什么问题想问吗？

**第一部分：日常用药常态**

**核心问题**

1. 请您带我走一遍“典型的一天”：从早到晚，您通常怎么吃药？
2. 您一般把药放在哪里？是什么帮助您记得吃药？
3. 有谁会参与或影响您的用药安排吗？比如家人、照护者等？

**追问（按需）**

- 您通常几点吃？跟吃饭有没有关系？
- 您用过哪些提醒工具/方法（分药盒、闹钟、便签等）？
- 哪些因素让您更容易坚持？哪些因素会让您更难做到？

**第二部分：漏服/停药/用药方式改变及其情境**

**核心问题**

1. 过去一个月里，您有没有漏服、晚服、停药，或自己改变用药方式？请详细讲一两个最典型的例子。
2. 当时发生了什么事？
3. 当时您是怎么做决定的？为什么会那样做？

**追问（按需）**

- 主要是忘了、不想吃，还是客观上做不到？
- 有没有副作用或“药伤身”的担心？
- 改变用药前有没有咨询医生/护士/药师？如果没有，原因是什么？

**第三部分：扰动与困难时期**

**核心问题**

1. 有没有一段时间您觉得特别难按医嘱坚持？最困难的是什么？
2. 那段时间您的情绪状态如何？
3. 这些困难对您“长期能不能坚持”的信心有什么影响？

**追问（按需）**

- 当您想到要跳过/停药时，脑子里最常出现的想法是什么？
- 您有没有向医生或家人隐瞒漏服？为什么会这样？
- 如果用0–10分表示当时的信心，您会打几分？为什么？

**第四部分：转折点与资源动员**

**核心问题**

1. 有没有一个“转折点”让您重新重视吃药或更规律地吃？发生了什么？
2. 最能帮助您“重新回到正轨”的是什么？
3. 转折之后，您对药物/疾病/风险的理解有没有变化？具体怎么变的？

**追问（按需）**

- 哪一句解释/哪类信息对您影响最大？
- 您向谁求助？哪种支持最有用？
- 哪些资源是缺失的？您当时怎么应对？

**第五部分：修复与长期维持策略**

**核心问题**

1. 现在您用哪些方法让吃药更稳定？
2. 目前最稳定的环节是什么？最容易出问题的环节是什么？
3. 什么因素最能推动您长期坚持？什么因素会让您更难坚持？

**追问（按需）**

- 对于出行、轮班、突发事件或副作用，您有没有预案？
- 哪些反馈会增强您坚持的动力？
- 吃药是否逐渐成为您日常生活的一部分？具体体现在哪里？

**收尾与核对**

1. 如果您给医护人员一句建议：怎样更能帮助PCI术后患者坚持吃药？
2. 还有什么重要的用药经历，是我们没有谈到但您想补充的？

**访谈员总结核对**

- 简要总结受访者要点并询问：“我这样理解对吗？您还想补充或澄清什么？”
