# Supplementary material
Source: Research Square preprint supplement (doi:10.21203/rs.3.rs-9600351/v1)
Supplement: Supplementary file 3 [file be677030d07a213d5f164c16.xlsx]

## Sheet: Exemplar_Coding
Original quote (Chinese)	English translation	Initial code	Subtheme	Theme
主要还是早上最容易被打乱。早上经常一开会就是连着几个会，整个节奏一下子就乱了，药也顾不上按时吃。	Mornings are the easiest time to get disrupted. Meetings run back to back, and once the day gets going, it is hard to find the right moment again.	back-to-back meetings disrupt morning dosing	Routine fragmentation and competing priorities	Behavioural Disruption
抢单的时候经常是一单接着一单，我只能先顾着把手头的单送完，等忙完再回过神来，吃药的时间点往往已经过了。	When orders keep coming one after another, I have to finish the deliveries first. By the time I remember the medicine, the scheduled time has already passed.	work demands displace the dosing schedule	Routine fragmentation and competing priorities	Behavioural Disruption
我越忙的时候越怕自己吃错药，所以会一遍一遍地核对，结果反而把时间拖过去了，最后还是没能按时吃上。	The busier I am, the more afraid I am of taking it wrongly, so I keep checking again and again. But that only delays me, and by the time I am sure, the time window has passed.	repeated checking delays execution	Cognitive overload and regimen complexity	Behavioural Disruption
记性不太好的时候，我常常拿不准自己到底吃过没有，越是不确定，心里就越慌，也越不敢轻易再吃。	When my memory is poor, I cannot tell whether I have already taken it. The more unsure I am, the more anxious I get.	uncertainty about dose status creates anxiety	Cognitive overload and regimen complexity	Behavioural Disruption
一看到身上有出血点，我心里就会立刻紧张起来，忍不住怀疑是不是药太伤身体了，这样一来就更不敢按时吃了。	When I notice bleeding, I get nervous and start wondering whether the medicine is harming me, which makes me even less willing to take it.	bleeding is interpreted as medication harm	Emerging concerns about harm and bodily signals	Behavioural Disruption
一旦肌肉开始疼，我就会怀疑是不是药把身体吃坏了，心里会想着先缓一缓、停一停再说。	When my muscles start hurting, I suspect the medicine may be harming my body, and I feel like stopping for a while.	bodily discomfort prompts hesitation	Emerging concerns about harm and bodily signals	Behavioural Disruption
我不太会用手机设置提醒，平时更多是靠纸条记着，但纸条一旦弄丢了，整个提醒节奏就全乱了，很容易漏掉。	I am not very good at using phone reminders, and if I lose the note, everything becomes chaotic.	fragile reminder system leads to missed doses	Thin support and misaligned reminders	Behavioural Disruption
儿子越是催我、盯着我，我心里就越烦，反而更不想在那个当下把药吃下去。	The more my son pushes me, the more irritated I get, and the less I want to take it right then.	pressure-based reminders trigger resistance	Thin support and misaligned reminders	Behavioural Disruption
有时候我会觉得自己一直都挺稳定的，偶尔漏一次应该也没什么，就没太把这件事放在心上。	Sometimes I feel quite stable, so if I miss one dose, I tell myself it is probably not a big deal.	one missed dose is framed as harmless	Rationalising disengagement	Adherence Withdrawal
我有时候会想，要不先停一天看看吧，反正就一天，应该也不会出什么大问题。	Sometimes I think about stopping for a day just to see what happens. In my mind, it is only one day, so it does not seem like a big deal.	temporary stopping is justified as low risk	Rationalising disengagement	Adherence Withdrawal
家里人问我吃没吃药，我有时候就会含糊过去，不想让他们担心，也不想被一直念叨。	When my family asks whether I have taken the medicine, I sometimes answer vaguely. I do not want them to worry, and I do not want to be nagged either.	vague answers conceal lapses	Avoidance and concealment	Adherence Withdrawal
我怕别人说我不自律，所以就算漏了药，也不太敢主动讲出来。	I do not really want the doctor to know I have missed doses, because it feels like they will think I have not managed it well.	non-disclosure to avoid judgement	Avoidance and concealment	Adherence Withdrawal
漏了几次以后，我心里就开始发虚，觉得自己可能真的坚持不下去了，慢慢就有点随它去了。	After missing it a few times, I start to feel unsure and wonder whether I can really keep this up for the long term. Once I think like that, I become much more passive.	repeated lapses erode confidence	Eroded self-efficacy and depleted motivation	Adherence Withdrawal
那段时间我情绪也比较低，会觉得怎么连吃药这件事都这么难，慢慢地连坚持下去的那股劲都没了。	At that time my mood was low, and I kept thinking that this should not be so hard. Once I felt like that, my motivation just dropped.	low mood reduces motivation	Eroded self-efficacy and depleted motivation	Adherence Withdrawal
我不太敢去问医生，一方面怕麻烦人家，另一方面也怕被说，就想着自己先扛着、自己处理。	I rarely ask. Partly it feels troublesome, and partly I worry about being judged, so I try to handle it on my own.	hesitation to seek clarification	Social withdrawal and reduced help-seeking	Adherence Withdrawal
有时候我怕麻烦医生，就自己估摸着把吃药时间往后挪到下班以后再说。	I did not want to trouble the doctor, so I just guessed my way through it and decided to take the medicine after work.	self-guessing instead of help-seeking	Social withdrawal and reduced help-seeking	Adherence Withdrawal
复查的时候，医生说有些指标不太好，我一下子就紧张起来了，觉得不能再像以前那样随便对待吃药这件事了。	At follow-up, the doctor said some results were not very good, and that really made me tense. I felt I could not keep being so casual about the medicine.	abnormal follow-up triggers a wake-up moment	Salience of risk and wake-up moments	Resilience Activation
后来看到一个同事又住院了，我一下子就警醒了，觉得这事不能再靠运气，哪怕再晚也得想办法把药吃上。	Later I saw a colleague being admitted to hospital again, and it hit me hard. I realised I could not just rely on luck, and even if it was late, I still had to find a way to take the medicine.	others' adverse events heighten risk salience	Salience of risk and wake-up moments	Resilience Activation
后来医生把哪些情况必须按时、哪些情况不能随便停药讲清楚以后，我心里才踏实下来，也才敢按规矩来。	Later the doctor explained clearly which medicines really could not be stopped casually and what I should do if I missed a dose. After that, I felt much more certain about what to do.	clear rules reduce uncertainty	Credible explanation and sense-making	Resilience Activation
后来医生把哪些情况算严重、哪些情况不用太担心讲明白了，我就不用再靠自己瞎猜了。	Later the doctor explained which situations were serious and which were not, and after that I did not have to keep guessing on my own.	credible explanation replaces guessing	Credible explanation and sense-making	Resilience Activation
我在群里看别人怎么分药、怎么设提醒，才发现原来大家也会被打乱，这样一来我就没那么自责了。	In the group, I saw how other people sorted their pills and set reminders. I realised everyone gets disrupted sometimes, so I stopped blaming myself so much.	peer strategies normalise lapses	Vicarious learning and normalisation	Resilience Activation
工友教我把药放在饭盒旁边，我一看到饭盒就能想起来，确实比以前更容易记住。	A co-worker told me to put the medicine next to my lunch box, so whenever I saw the lunch box, I would remember the pills as well.	practical cueing strategy learned from others	Vicarious learning and normalisation	Resilience Activation
我媳妇不催我，她会先把药分好放在桌上，吃饭的时候顺便提醒一句，我反而更愿意按时吃。	My wife does not push me. She sorts the pills and puts them on the table, then reminds me casually at mealtimes, and that makes me much more willing to take them.	collaborative support reduces resistance	Re-aligning support toward accompaniment	Resilience Activation
我老婆现在也不骂我了，就是提前把药摆好，吃饭时顺嘴提醒一下，这样我心里反而没那么抗拒。	My partner does not scold me anymore. She lays the medicine out in advance and gives me a casual reminder at mealtimes, so it no longer feels like pressure.	tone shifts from pressure to accompaniment	Re-aligning support toward accompaniment	Resilience Activation
我现在会把药分装在随身的小盒里，就算出去聚餐，也能找个空当顺手把药吃了。	I put the pills into a small box that I can carry with me, so even if I go out for dinner, I can still find a moment to take them.	portable pill box supports execution	Tooling and planning for execution	Behavioural Recovery
我现在会用分药盒和清单，早上出门前看一眼，就知道自己到底吃没吃，心里会踏实很多。	Now I use both a pill box and a checklist. Before I leave in the morning, one look tells me whether I have already taken the medicine.	pill box and checklist reduce uncertainty	Tooling and planning for execution	Behavioural Recovery
我现在把吃药和刷牙绑在一起，洗漱完顺手就吃了，不用再反复去想、去算。	I link taking the medicine to brushing my teeth. Once I have washed up, I take it straight away, so I do not have to keep reminding myself.	linking medication to an existing routine	Habit-linking and environmental anchoring	Behavioural Recovery
我把吃药跟起床后的第一件事绑在一起，醒来先喝水吃药，再去做别的事，这样就稳定多了。	I tie taking the medicine to the first thing I do after waking up: drink some water, take the pills, and only then start the rest of the day.	anchoring dosing to the morning transition	Habit-linking and environmental anchoring	Behavioural Recovery
现在出门我都会带一份备用药，就算临时改了行程，也还能把这顿药接上，不至于一下子断掉。	When I go out, I carry a backup set of medicine with me, so even if my schedule changes at short notice, I can still keep the routine going.	backup medication prevents disruption	Contingency strategies and error recovery	Behavioural Recovery
我现在会提前把药分装好，出门的时候随身带着，就算后面行程有变化，也还能接得上。	Now I pack the medicine in advance and carry it with me, so even if the schedule changes, I can pick the routine up again straight away.	advance packing supports continuity	Contingency strategies and error recovery	Behavioural Recovery
后来复查结果稍微好了一点，我心里就踏实了，觉得坚持吃药确实是有用的，所以也更愿意照着做下去。	Later my follow-up results improved a little, which reassured me. I felt that sticking with the medicine was actually doing something, so I was more willing to keep going.	improved results reinforce effort	Feedback-driven mastery and confidence rebuilding	Behavioural Recovery
医生也肯定我复查比以前好了，我就更有信心继续坚持下去。	When the doctor confirmed that my follow-up results had improved, I felt more confident about carrying on.	positive follow-up rebuilds confidence	Feedback-driven mastery and confidence rebuilding	Behavioural Recovery
现在到了时间，我自己就会想起来，吃药已经有点像吃饭一样了，基本不太需要别人再盯着。	Now when it is time, I remember it by myself. Taking the medicine is a bit like eating now - I hardly need anyone to watch over me.	automaticity reduces monitoring burden	Automaticity and low-burden maintenance	Re-stabilisation
现在感觉比以前轻松多了。以前老要惦记着吃药，现在慢慢已经成了日常生活里很自然的一部分。	It feels much easier now. I used to keep the medicine on my mind all the time, but now it has simply become part of the day.	cognitive burden decreases over time	Automaticity and low-burden maintenance	Re-stabilisation
现在我会提醒自己，这是我对自己身体负责，不是为了应付谁，也不是做给别人看的。	Now I remind myself that this is my own responsibility. I am not taking the medicine just to satisfy other people; I am doing it for myself.	self-responsibility supports persistence	Identity alignment and self-responsibility narrative	Re-stabilisation
以前更像是别人叫我去做，现在更像是我自己在照顾自己、为自己负责。	Before, it felt more like something other people were telling me to do. Now it feels more like part of how I take care of myself.	adherence is integrated into self-care identity	Identity alignment and self-responsibility narrative	Re-stabilisation
以前我们老是为了吃药这件事吵来吵去，后来慢慢变成一起准备、一起配合，冲突就少了很多。	We used to argue about the medicine quite often. Later, we started preparing it together, and the conflict eased off a lot.	shared preparation reduces conflict	Recalibrated relationships and sustainable support	Re-stabilisation
后来他们不再老盯着我、催着我，而是提前帮我把药准备好，我就没那么抗拒了，也更容易长期坚持下来。	Later they stopped checking on me all the time and started helping me get things ready instead. I felt less resistant, and it became easier to keep going over time.	support shifts from surveillance to practical help	Recalibrated relationships and sustainable support	Re-stabilisation
偶尔被打乱的时候，我现在也会想办法重新遵医嘱吃药，不会再像以前那样一乱就乱很久。	Even if things get disrupted sometimes, I know how to bring the medication routine back. I no longer stay in a mess for a long time like before.	rapid recovery after lapse	Resilient cycling under new disruptions	Re-stabilisation
现在遇到一点突发情况，我也不像以前那么慌了，而是先想着怎么能恢复以前那样规律的吃药。	Now if something unexpected happens, I do not panic the way I used to. I just think about how to get back to the routine as soon as I can.	non-catastrophic interpretation supports repair	Resilient cycling under new disruptions	Re-stabilisation

## Sheet: Theme_Subtheme_OpenCodes
Theme	Subtheme	Example open codes (top)
Behavioural Disruption	Routine fragmentation and competing priorities	Context-dependent adherence stability (weekend vs workday) | Back-to-back meetings compress the dosing window | Priority displaced by immediate work demands | Shift work disrupts timing schema
	Cognitive overload and regimen complexity	High cognitive load crowds out remembering medication | Uncertainty about taken/missed doses | Uncertainty about how to recover after a missed dose | Checking loop increases delay | Rule complexity causes hesitation | Fear of wrong medication delays dosing
	Emerging concerns about harm and bodily signals	Bodily signals trigger medication-related suspicion | Harm concern leads to delayed dosing | Anxiety creates decision paralysis | Online misinformation amplifies harm concerns
	Thin support and misaligned reminders	Reminder occurs in non-actionable contexts | Silencing reminders with the intention to delay | Reminder misalignment and drop-off | Thin support leads to omission | Coercive reminding triggers resistance
Adherence Withdrawal	Rationalising disengagement	Minimising lapse risk | Minimising the significance of a lapse to reduce psychological discomfort | Justifying temporary disengagement
	Avoidance and concealment	Fear of judgement suppresses disclosure | Soft concealment to avoid worry or criticism | Hiding missed doses to avoid conflict
	Eroded self-efficacy and depleted motivation	Efficacy drops after repeated slips | Repeated mistakes deplete motivation | Nothing seems to make adherence stable anymore
	Social withdrawal and reduced help-seeking	Reduced help-seeking | Avoiding consultation because it feels troublesome | Problem ambiguity delays help-seeking | Managing uncertainty alone
Resilience Activation	Salience of risk and wake-up moments	Test feedback triggers a wake-up moment | Risk wake-up prompts reset | Risk salience from others’ adverse events
	Credible explanation and sense-making	Clear explanation and recovery rules reduce uncertainty | Clear rules enable sense-making | Credible explanation restores confidence
	Vicarious learning and normalisation	Peer tips normalise slips and provide tactics | Peer tactics support anchoring | Peer support builds routine
	Re-aligning support toward accompaniment	Collaborative, low-pressure support increases acceptance | Support shifts toward accompaniment | Accompaniment support improves comprehension
Behavioural Recovery	Tooling and planning for execution	Building a structured execution workflow | Tooling enables execution in social settings | Tooling reduces cognitive load
	Habit-linking and environmental anchoring	Habit-linking reduces complexity | Environmental anchoring supports routine | Habit-linking after waking
	Contingency strategies and error recovery	Redundancy across locations and fallback reminders prevents gaps | Contingency planning prevents gaps | Contingency stock prevents gaps
	Feedback-driven mastery and confidence rebuilding	Positive feedback reinforces adherence | Feedback rebuilds mastery | Better results strengthen confidence
Re-stabilisation	Automaticity and low-burden maintenance	Medication becomes an automatic routine | Low-burden automaticity emerges | Stable cues reduce mental load
	Identity alignment and self-responsibility narrative	Identity responsibility narrative | Medication taking becomes part of self-care | Self-responsibility guides adherence
	Recalibrated relationships and sustainable support	Sustainable support recalibration | Monitoring shifts toward cooperative support | Support becomes less conflictual and more durable
	Resilient cycling under new disruptions	Resilient cycling under disruptions | Resilient cycling mindset | Rapid return after disruption
